# Supplementary material
Source: publisher figshare collection journal article supplement (https://acs.figshare.com/ndownloader/files/5400785)
Supplement: Supplementary file 1 [file 5400785]

# Aromatic-Exfoliated Transition Metal Dichalcogenides: Implications for Inherent Electrochemistry and Hydrogen Evolution

*Shu Min Tan,<sup>a</sup> Zdeněk Sofer,<sup>b</sup> Jan Luxa,<sup>b</sup> Martin Pumera<sup>a\*</sup>*

<sup>a</sup> School of Physical and Mathematical Sciences, Division of Chemistry and Biological Chemistry, Nanyang Technological University, 21 Nanyang Link, 637371 Singapore.

<sup>b</sup> Department of Inorganic Chemistry, University of Chemistry and Technology Prague, Technická 5, 166 28 Prague 6, Czech Republic.

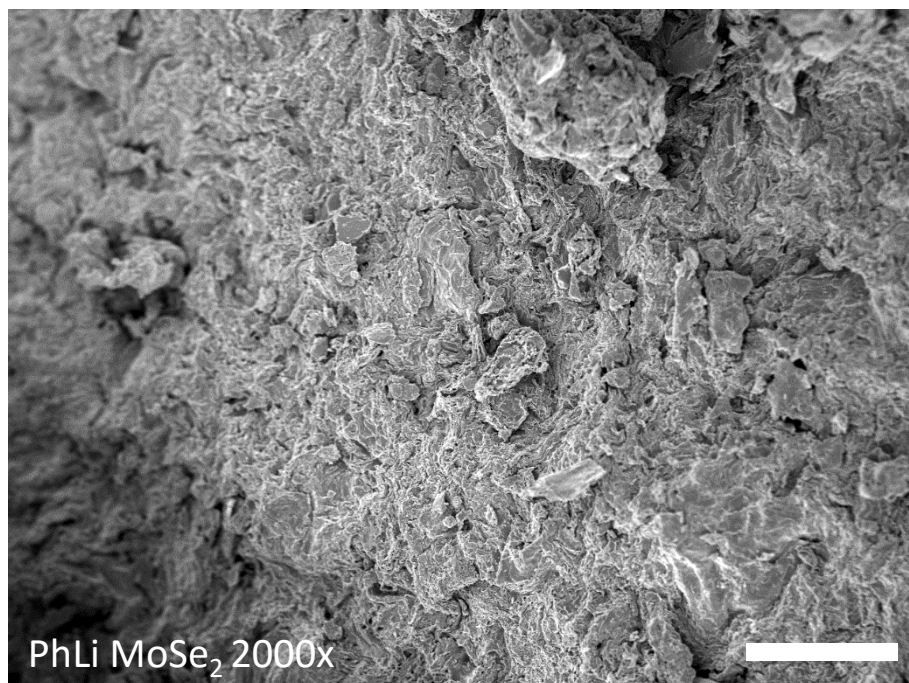

**Figure S1** Scanning electron micrograph of MoSe<sub>2</sub>, after treatment with phenyllithium, followed by exfoliation in water. Scale bar represents 10 μm.

**Table S1** Full width at half maximum (fwhm) values of  $E_{2g}$  and  $A_{1g}$  peaks of MoS<sub>2</sub>, MoSe<sub>2</sub>, WS<sub>2</sub>, and WSe<sub>2</sub>, together with the corresponding peak separations.

| Material                            | fwhm (cm <sup>-1</sup> ) |          | Peak separation between $E_{2g}$ and $A_{1g}$ (cm <sup>-1</sup> ) <sup>c</sup> |
|-------------------------------------|--------------------------|----------|--------------------------------------------------------------------------------|
|                                     | $E_{2g}$                 | $A_{1g}$ |                                                                                |
| Bulk MoS <sub>2</sub>               | 6.3                      | 7.0      | 25.8                                                                           |
| PhLi MoS <sub>2</sub>               | 7.7                      | 8.0      | 25.4                                                                           |
| Naph MoS <sub>2</sub>               | 10.2                     | 10.7     | 25.0                                                                           |
| Anth MoS <sub>2</sub>               | 9.5                      | 9.8      | 24.8                                                                           |
| Bulk MoSe <sub>2</sub> <sup>a</sup> | -                        | 6.5      | 43.1                                                                           |
| PhLi MoSe <sub>2</sub> <sup>a</sup> | -                        | 8.1      | 44.2                                                                           |
| Naph MoSe <sub>2</sub> <sup>a</sup> | -                        | 19.4     | 49.1                                                                           |
| Anth MoSe <sub>2</sub> <sup>a</sup> | -                        | 7.7      | 45.0                                                                           |
| Bulk WS <sub>2</sub>                | 13.2                     | 6.6      | 70.0                                                                           |
| PhLi WS <sub>2</sub>                | 14.2                     | 8.1      | 68.7                                                                           |
| Naph WS <sub>2</sub>                | 7.9                      | 8.5      | 64.2                                                                           |
| Anth WS <sub>2</sub>                | 12.9                     | 10.6     | 63.9                                                                           |
| Bulk WSe <sub>2</sub> <sup>b</sup>  | 11.7                     | -        | -                                                                              |
| PhLi WSe <sub>2</sub> <sup>b</sup>  | 17.9                     | -        | -                                                                              |
| Naph WSe <sub>2</sub> <sup>b</sup>  | 23.8                     | -        | -                                                                              |
| Anth WSe <sub>2</sub> <sup>b</sup>  | 42.3                     | -        | -                                                                              |

<sup>a</sup> The signal-to-noise ratio of  $E_{2g}$  peak of MoSe<sub>2</sub> is low for determination of its fwhm.

<sup>b</sup> The  $E_{2g}$  and  $A_{1g}$  peaks of WSe<sub>2</sub> overlap, rendering the peak separation indeterminate. The fwhm provided are of the overlapped  $E_{2g}/A_{1g}$  peaks of WSe<sub>2</sub>.

<sup>c</sup> The differing exfoliation efficiencies derived from the Raman spectroscopy (based on  $E_{2g}$ - $A_{1g}$  peak separation) and surface area measurements are likely due to the utilization of different solvents for sample preparation (DMF for Raman spectroscopy and deionized water for methylene blue adsorption), which is limited by the suitability of their properties for the technique used. However, since TMD dispersions in DMF were used for all measurements except for methylene blue adsorption, the Raman spectroscopy data is expected to be more illustrative of the relationship between the extent of exfoliation and the intercalant used, compared to the surface area measurements.

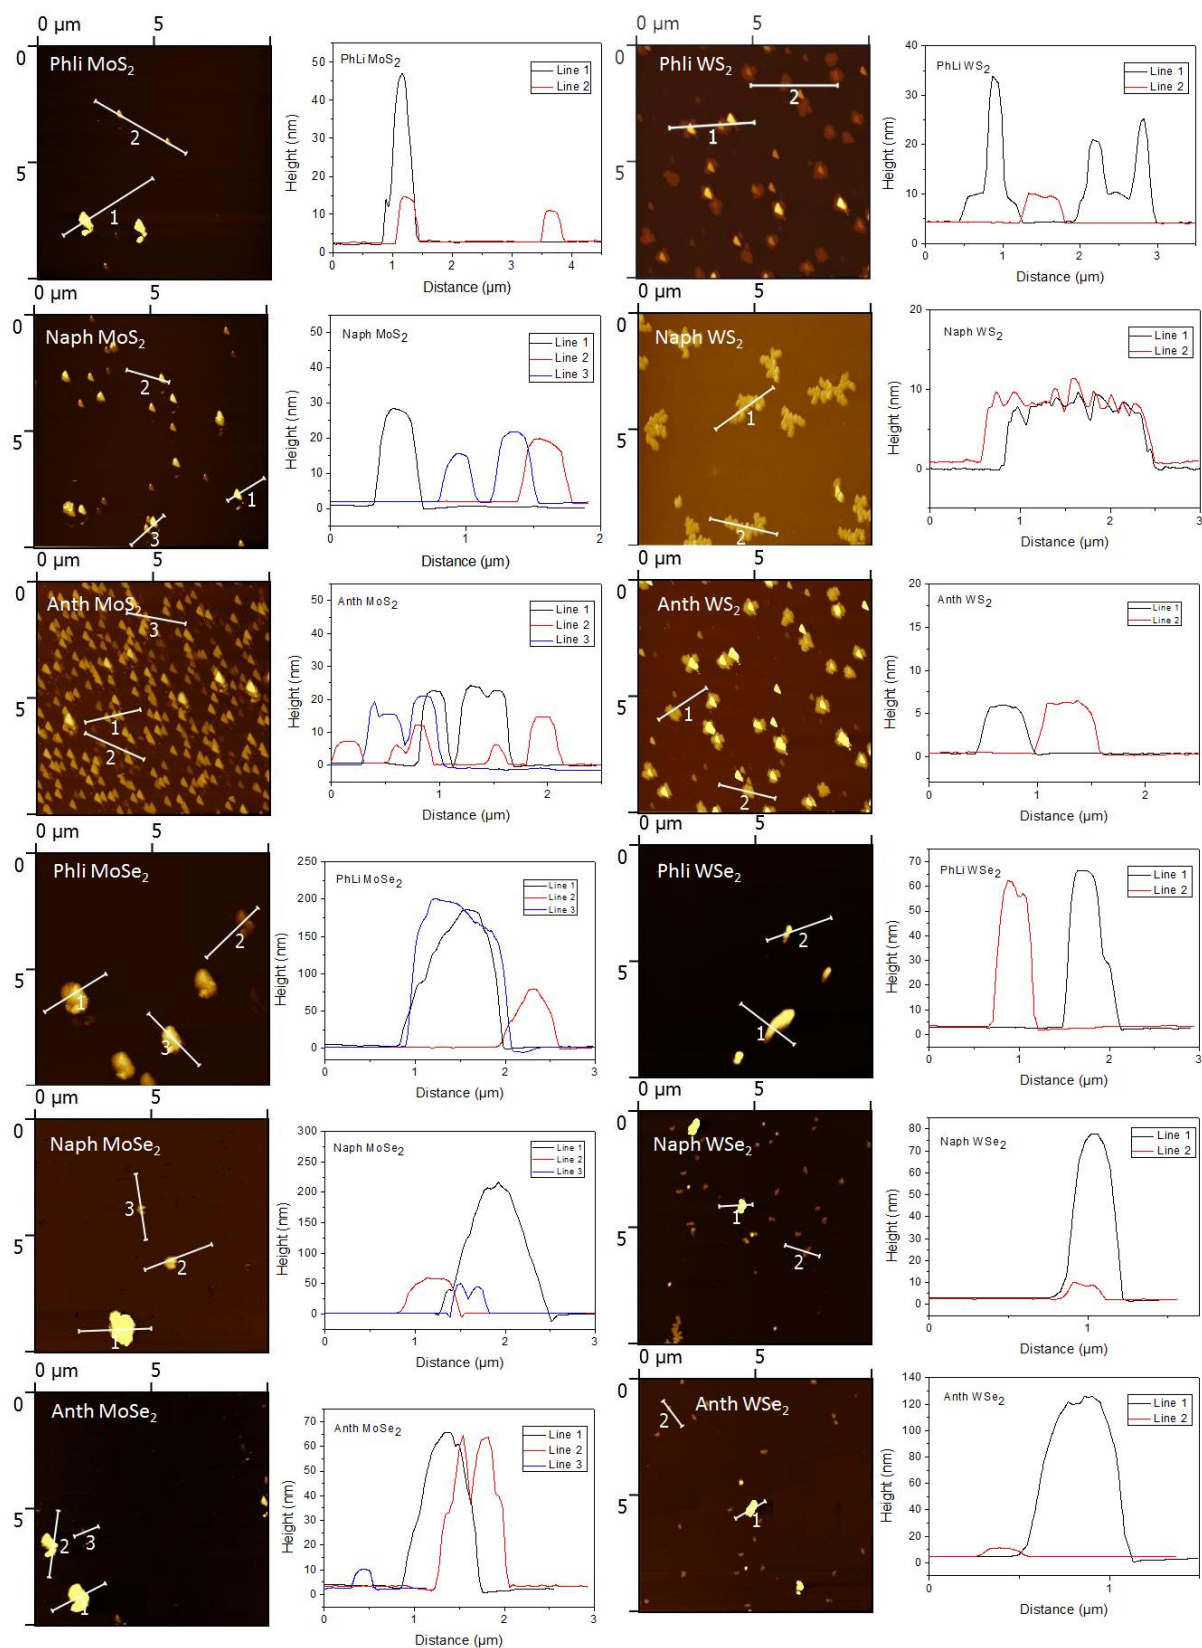

**Figure S2** AFM measurements and corresponding height profiles of exfoliated  $\text{MoS}_2$ ,  $\text{MoSe}_2$ ,  $\text{WS}_2$ , and  $\text{WSe}_2$ .

**Table S2** 1T/2H ratios of MoS<sub>2</sub>, MoSe<sub>2</sub>, WS<sub>2</sub> and WSe<sub>2</sub> in the bulk state and after treatment with phenyllithium, sodium naphthalenide or sodium anthracenide, followed by exfoliation in water, obtained from XPS data.

| 1T/2H ratio | Materials        |                   |                 |                  |
|-------------|------------------|-------------------|-----------------|------------------|
|             | MoS <sub>2</sub> | MoSe <sub>2</sub> | WS <sub>2</sub> | WSe <sub>2</sub> |
| Bulk        | 0                | 0.205             | 0.108           | 0                |
| PhLi        | 0.367            | 1.002             | 4.369           | 0.921            |
| Naph        | 0.406            | 0.709             | 3.485           | 0.987            |
| Anth        | 0.156            | 0.258             | 0.678           | 0                |

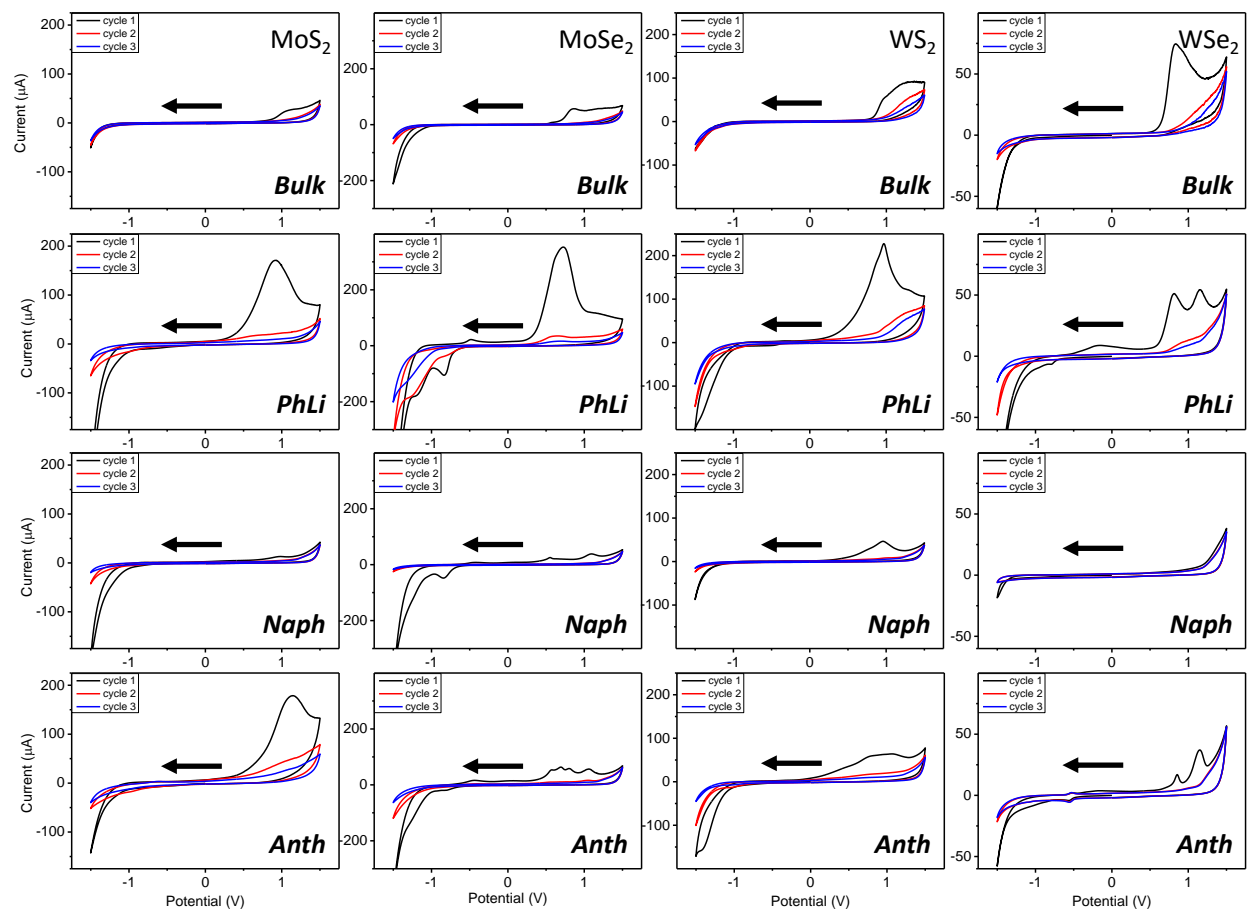

**Figure S3** Inherent electrochemistry of (left to right)  $\text{MoS}_2$ ,  $\text{MoSe}_2$ ,  $\text{WS}_2$ , and  $\text{WSe}_2$ , (top to bottom) untreated and after treatment with phenyllithium, sodium naphthalenide or sodium anthracenide, followed by exfoliation in water. Each measurement was run for three cycles (as indicated), with the starting potential at 0 V. The arrows denote the initial scan direction and the y-axes were scaled to a uniform range for each TMD. Conditions: scan rate of  $100 \text{ mV s}^{-1}$ , phosphate buffer solution (50 mM, pH 7.2) as electrolyte, purged with  $\text{N}_2$ .

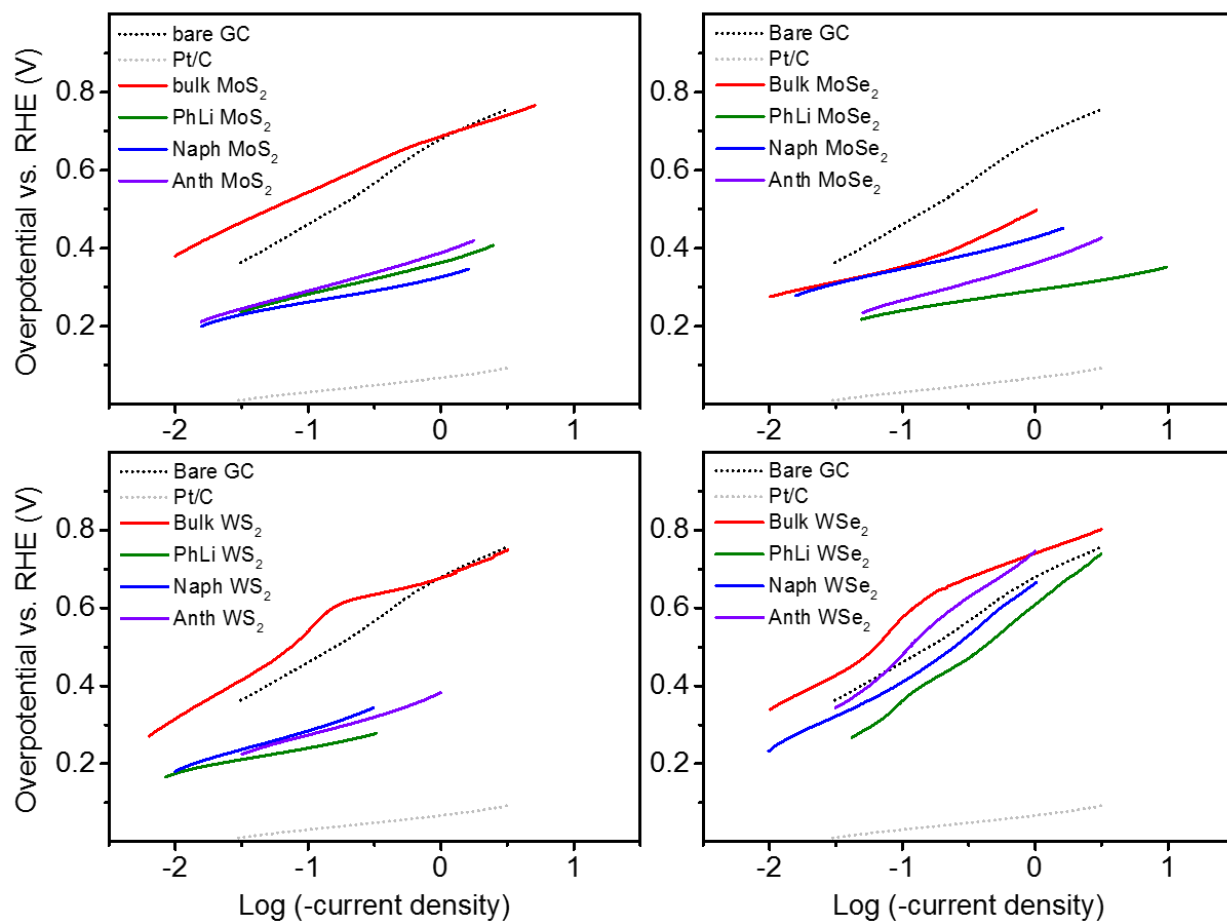

**Figure S4** Plots of Tafel slopes of MoS<sub>2</sub>, MoSe<sub>2</sub>, WS<sub>2</sub>, and WSe<sub>2</sub>, untreated and after treatment with phenyllithium, sodium naphthalenide or sodium anthracenide, followed by exfoliation in water, together with those of Pt/C (grey, dotted) and bare GC electrode (black, dotted).

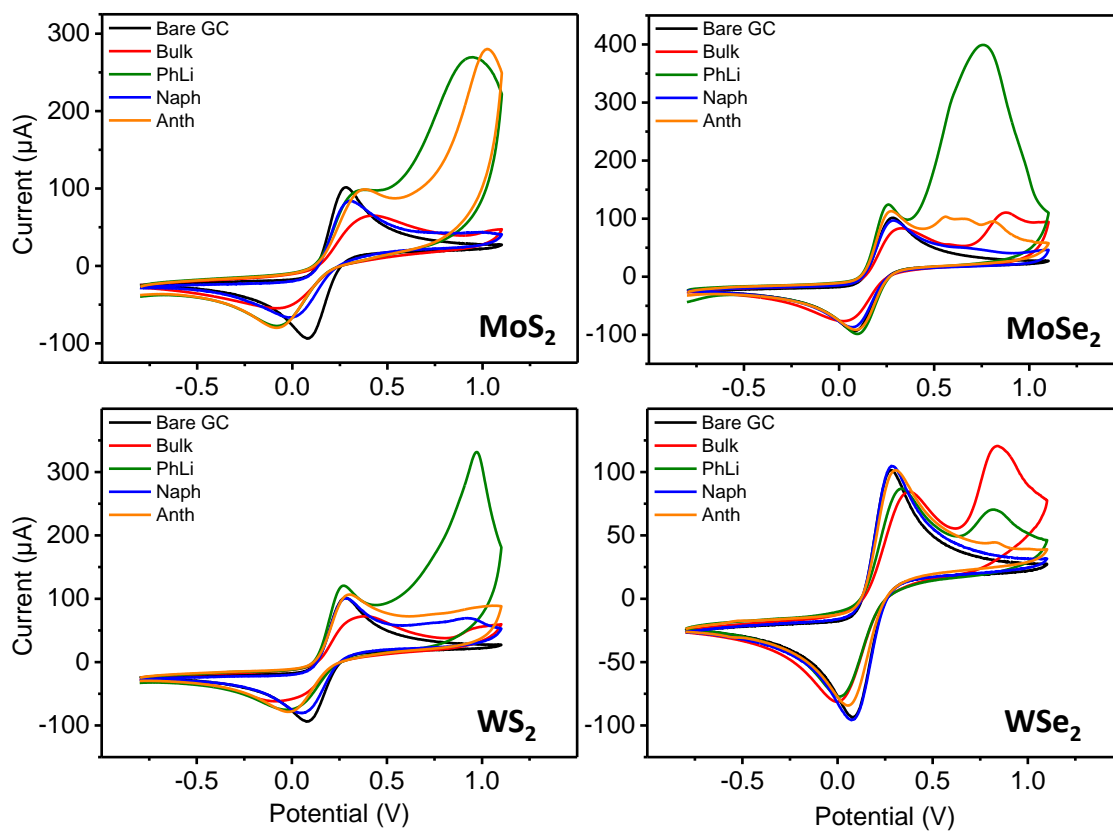

**Figure S5** Cyclic voltammograms of  $\text{Fe}(\text{CN})_6^{4-/3-}$  on  $\text{MoS}_2$ ,  $\text{MoSe}_2$ ,  $\text{WS}_2$ , and  $\text{WSe}_2$ , as indicated, untreated and after treatment with phenyllithium, sodium naphthalenide or sodium anthracenide, followed by exfoliation in water, as well as that of bare GC. Conditions: 10 mM  $\text{Fe}(\text{CN})_6^{4-/3-}$ , scan rate of  $100 \text{ mV s}^{-1}$ , 50 mM phosphate buffer solution (pH 7.2) as supporting electrolyte, purged with  $\text{N}_2$ .



**Table S3** Calculated heterogeneous electron transfer rate constant ( $k_{\text{obs}}^0$ ) for  $\text{Fe}(\text{CN})_6^{4-/3-}$  on  $\text{MoS}_2$ ,  $\text{MoSe}_2$ ,  $\text{WS}_2$  and  $\text{WSe}_2$  in the bulk state and after treatment with phenyllithium, sodium naphthalenide or sodium anthracenide, followed by exfoliation in water. The  $k_{\text{obs}}^0$  value of bare glassy carbon (GC) is also shown for reference.

| $k_{\text{obs}}^0$ (cm s <sup>-1</sup> ) | Materials             |                       |                       |                       |                       |
|------------------------------------------|-----------------------|-----------------------|-----------------------|-----------------------|-----------------------|
|                                          | $\text{MoS}_2$        | $\text{MoSe}_2$       | $\text{WS}_2$         | $\text{WSe}_2$        | Bare GC               |
| Bulk                                     | $2.94 \times 10^{-5}$ | $2.96 \times 10^{-4}$ | $4.37 \times 10^{-5}$ | $1.10 \times 10^{-4}$ | $1.24 \times 10^{-3}$ |
| PhLi                                     | $2.84 \times 10^{-5}$ | $1.21 \times 10^{-3}$ | $1.12 \times 10^{-4}$ | $1.06 \times 10^{-4}$ | -                     |
| Naph                                     | $2.18 \times 10^{-4}$ | $7.01 \times 10^{-4}$ | $6.25 \times 10^{-4}$ | $1.14 \times 10^{-3}$ | -                     |
| Anth                                     | $2.71 \times 10^{-5}$ | $1.23 \times 10^{-3}$ | $1.03 \times 10^{-4}$ | $6.15 \times 10^{-4}$ | -                     |

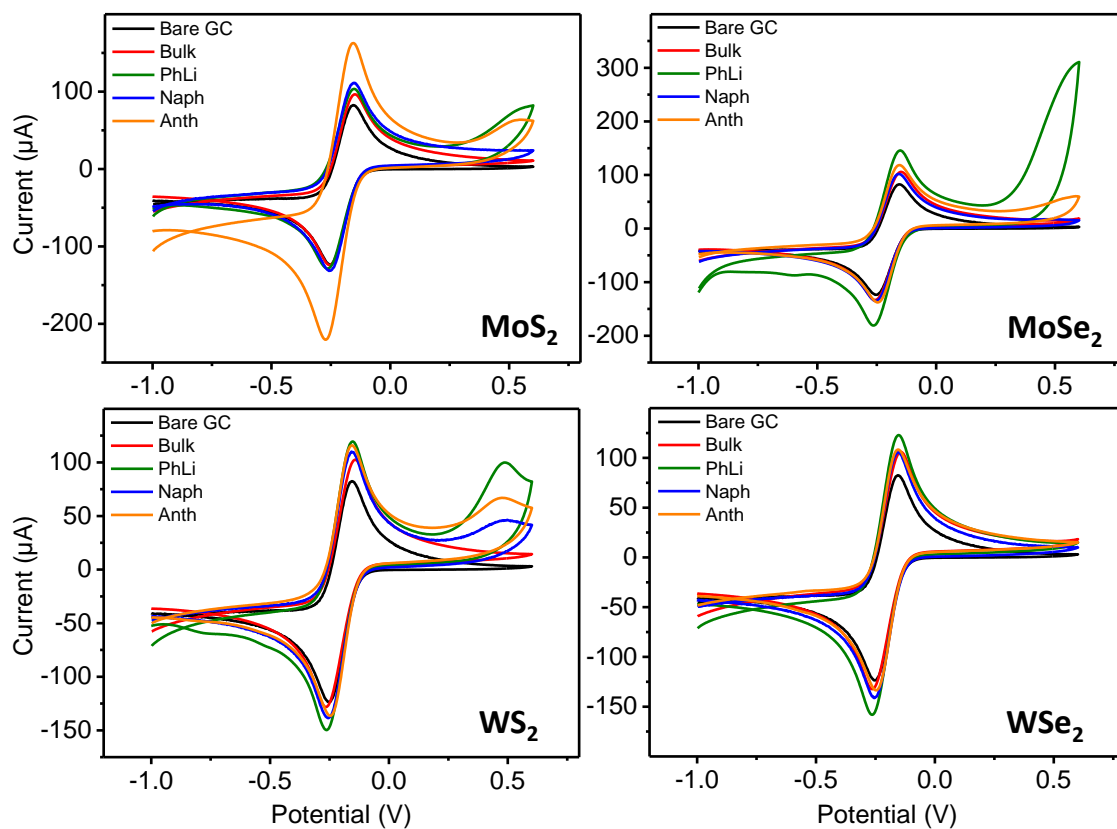

**Figure S6** Cyclic voltammograms of  $\text{Ru}(\text{NH}_3)_6^{2+/3+}$  on  $\text{MoS}_2$ ,  $\text{MoSe}_2$ ,  $\text{WS}_2$  and  $\text{WSe}_2$ , as indicated, untreated and after treatment with phenyllithium, sodium naphthalenide or sodium anthracenide, followed by exfoliation in water, as well as that of bare GC. Conditions: 10 mM  $\text{Ru}(\text{NH}_3)_6^{2+/3+}$ , scan rate of  $100 \text{ mV s}^{-1}$ , 50 mM phosphate buffer solution (pH 7.2) as supporting electrolyte, purged with  $\text{N}_2$ .

**Table S4** Calculated heterogeneous electron transfer rate constant ( $k_{\text{obs}}^0$ ) for  $\text{Ru}(\text{NH}_3)_6^{2+/3+}$  on  $\text{MoS}_2$ ,  $\text{MoSe}_2$ ,  $\text{WS}_2$  and  $\text{WSe}_2$  in the bulk state and after treatment with phenyllithium, sodium naphthalenide or sodium anthracenide, followed by exfoliation in water. The  $k_{\text{obs}}^0$  value of bare glassy carbon (GC) is also shown for reference.

| $k_{\text{obs}}^0$ (cm s <sup>-1</sup> ) | Materials             |                       |                       |                       |                       |
|------------------------------------------|-----------------------|-----------------------|-----------------------|-----------------------|-----------------------|
|                                          | $\text{MoS}_2$        | $\text{MoSe}_2$       | $\text{WS}_2$         | $\text{WSe}_2$        | Bare GC               |
| Bulk                                     | $4.38 \times 10^{-3}$ | $4.28 \times 10^{-3}$ | $3.90 \times 10^{-3}$ | $3.97 \times 10^{-3}$ | $5.16 \times 10^{-3}$ |
| PhLi                                     | $4.18 \times 10^{-3}$ | $4.05 \times 10^{-3}$ | $4.19 \times 10^{-3}$ | $4.12 \times 10^{-3}$ | -                     |
| Naph                                     | $4.82 \times 10^{-3}$ | $5.10 \times 10^{-3}$ | $4.99 \times 10^{-3}$ | $4.83 \times 10^{-3}$ | -                     |
| Anth                                     | $3.91 \times 10^{-3}$ | $5.76 \times 10^{-3}$ | $5.69 \times 10^{-3}$ | $5.45 \times 10^{-3}$ | -                     |
